## RESEARCH ARTICLE

# Investigating the association between diabetes and carpal tunnel syndrome: A systematic review and meta-analysis approach

Elaheh Sanjari<sup>1</sup>, Hadi Raeisi Shahraki<sup>2</sup>, Lusine G. Khachatryan<sup>3</sup>, Abdollah Mohammadian-Hafshejani<sup>4\*</sup>

**1** Student Research Committee, Shahrekord University of Medical Sciences, Shahrekord, Iran, **2** Department of Epidemiology and Biostatistics, School of Public Health, Shahrekord University of Medical Sciences, Shahrekord, Iran, **3** Department of Pediatric Diseases, N.F. Filatov Clinical Institute of Children's Health, I.M. Sechenov First Moscow State Medical University (Sechenov University), Moscow, Russian Federation, **4** Assistant Professor of Epidemiology, Modeling in Health Research Center, Shahrekord University of Medical Sciences, Shahrekord, Iran

\* [amohamadii1361@gmail.com](mailto:amohamadii1361@gmail.com)

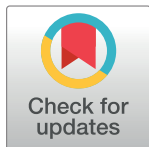

## Abstract

### Introduction

In recent years, several studies have reported on the relationship between diabetes and carpal tunnel syndrome (CTS). However, due to their contradictory results, a systematic review and meta-analysis were conducted to investigate this subject.

### Methods

This study is a systematic review and meta-analysis of studies published in ISI Web of Science, Scopus, PubMed, Cochrane, Google Scholar, and Embase databases. Heterogeneity in the studies included in the meta-analysis was evaluated using statistical tests such as the Chi-square test,  $I^2$ , and forest plots. Publication bias was assessed using Begg's and Egger's tests.

### Results

This investigation analyzed data from 42 studies conducted between 1985 and 2022, with a total of 3,377,816 participants. The meta-analysis demonstrated that the odds ratio (OR) of CTS in participants with a history of diabetes compared to those without was 1.90 (95% CI: 1.64–2.21; P-value < 0.001). Given that publication bias was observed in this study (Begg's test P-value = 0.01), the modified OR was calculated with consideration of missed studies, which was 1.68 (95% CI: 1.45–1.94; P-value < 0.001).

### Conclusion

The results of this study suggest that diabetic patients have 90% higher odds of developing CTS compared to non-diabetic individuals, which is statistically significant.

## OPEN ACCESS

**Citation:** Sanjari E, Raeisi Shahraki H, G. Khachatryan L, Mohammadian-Hafshejani A (2024) Investigating the association between diabetes and carpal tunnel syndrome: A systematic review and meta-analysis approach. PLoS ONE 19(4): e0299442. <https://doi.org/10.1371/journal.pone.0299442>

**Editor:** Rami M. Elshazli, Horus University, EGYPT

**Received:** December 4, 2023

**Accepted:** February 11, 2024

**Published:** April 16, 2024

**Copyright:** © 2024 Sanjari et al. This is an open access article distributed under the terms of the [Creative Commons Attribution License](https://creativecommons.org/licenses/by/4.0/), which permits unrestricted use, distribution, and reproduction in any medium, provided the original author and source are credited.

**Data Availability Statement:** All relevant data are within the manuscript and its [Supporting Information](#) files.

**Funding:** The author(s) received no specific funding for this work.

**Competing interests:** The authors have declared that no competing interests exist.

## Introduction

Carpal Tunnel Syndrome (CTS) is the most common focal mononeuropathy caused by median nerve compression, with a global prevalence of 2.7–5.8% [1–6]. This syndrome affects between 7% and 16% of the adult population and is the leading cause of sick leave and work disability [7]. Certain conditions that can cause this syndrome include metabolic disorders, collagen vascular diseases, obesity, kidney failure, contraceptive use, and endocrine disorders such as hypothyroidism [1, 2, 4, 8]. Moreover, diabetes, trauma, heavy manual, and repetitive work, tumors, amyloidosis, and sarcoidosis have all been identified as potential risk factors for CTS [1, 4, 9]. Symptoms of CTS include numbness, especially at night, and nerve pain, as well as neuropathic pain with localized compression of the median nerve in the wrist [10]. Whilst the sensory symptoms of this syndrome are often confined to the fingers, they can extend to the wrist, forearm, and even the entire hand. CTS becomes more common between the ages of 45 and 64 and in women than men (10% versus 1%) [2, 8].

Diabetes is a chronic multisystem disease characterized by high blood and urine glucose levels due to insufficient insulin production or use [11, 12]. In 2019, 79% of all adults with diabetes (463 million) lived in developing countries, with that figure expected to rise to 84% (700 million) by 2045 [13–15]. Diabetes has an estimated prevalence of 6.4% worldwide, with a predicted prevalence of 7.7% by 2030 [14]. Diabetes is one of the leading causes of disability worldwide. Its prevalence has risen due to population growth, aging, and lifestyle changes [4, 12, 16].

CTS has been reported to occur in up to 15% of diabetic patients. Reports suggest that the lifetime risk of developing CTS in a diabetic patient is approximately 85%, although previous research has yielded conflicting results regarding the association between diabetes and CTS [17–20].

Numerous studies have been conducted worldwide in recent years to investigate the relationship between diabetes and CTS, with a significant proportion of them demonstrating that diabetes increases the risk of developing CTS [3, 5, 21–26]. However, there are also studies that suggest that there is no association between diabetes and the occurrence of CTS [17, 27–34]. For instance, Wiberg et al. (2022) investigated the association between diabetes and CTS in a UK population-based cohort of over 400,000 people. They reported odds ratios of 2.31 (95% CI: 2.17–2.46) for the association between diabetes and CTS [35]. However, in a study conducted with Low et al. investigated the association between diabetes and CTS in the US, observed that adjusted odds ratio was equal to 0.84(95%CI: 0.65–1.09;  $P = 0.20$ ) [36].

Due to the inconsistencies in determining whether diabetes increases the risk of CTS or not, systematic review and meta-analysis studies are one of the best ways to draw a definite conclusion and answer the scientific question. This study aims to investigate the association between diabetes and CTS by means of the systematic review and meta-analysis method, using the results of research studies conducted in this field.

## Materials and methods

### Type of study and search strategies

In this systematic review and meta-analysis research, we utilized the principles of Preferred Reporting Items for Systematic Review and Meta-Analysis (PRISMA) when writing the report. We conducted a comprehensive search of published articles in databases including Pubmed, ISI Web of Knowledge, Cochrane, Embase, Google Scholar, and Scopus until the end of 2022. Our search criteria included diabetes as an exposure, and carpal tunnel syndrome as an outcome. To conduct the search, we utilized study keywords and their synonyms based on Mesh (Medical Subject Headings). Only studies including human subjects and published in the English language were considered. We followed the related instructions and guides provided

to search in each of the databases. Additionally, the sources of articles resulting from the search were manually reviewed to find more studies on this topic.

### Inclusion and exclusion criteria of study

As previously stated, the articles selected for inclusion in the study must have used case-control, cross-sectional, or cohort study designs. The main objective of the study was to investigate the association between diabetes and CTS and to determine the effect size of this relationship, with a 95% confidence interval (CI) presented in the article or calculated based on the information provided. Additionally, articles in the form of letters to the editor, editorial, protocol, review, meta-analysis, and ecological articles were excluded from the analysis.

### Specifications of study data collection tool

After collecting the articles, we entered their bibliographic information and abstracts into the Endnote version 8 reference management software. We diagnosed and removed any duplicate papers using this software, and then rechecked the titles of the remaining articles. In the next step, we reviewed the titles and discarded any articles not related to the purpose of the research. Among the remaining articles, we carefully reviewed the abstract and full text of each article to ensure that it was related to the purpose of the study, and removed any irrelevant items. To increase credibility, the process of searching and selecting articles was conducted by two independent researchers. In cases of disagreement between the two researchers, a third researcher was consulted to reach a consensus on the selection of the final articles.

### Data extraction

For each study, information such as the title, study type, article quality, first author's name, year of publication, country of study, gender and age range of participants, sample size, duration of follow-up, number of exposed and non-exposed groups in cohort studies, number of case and control groups in case-control studies, diabetes status of participants, and relative effect size (risk ratio, hazard ratio, or odds ratio) along with the 95% CI were collected from the related articles. The adjusted variables included in the multivariate model were also noted.

Two researchers independently extracted the desired data, and any disagreements were resolved through discussion with a third researcher. Articles that did not provide sufficient data to calculate the standard error for estimating the effect size were excluded from the study. Moreover, the latest findings from studies that had published their results multiple times were included in this systematic review.

### Evaluation of the quality of the articles

The Newcastle-Ottawa checklist was used to evaluate the quality of the articles, given its ability to provide a quantitative score. Based on the study method and corresponding checklist, the articles were divided into three categories: low quality, moderate quality, and good quality.

### Statistical methods

For studies where the effect size was calculated and presented separately for different time or seasonal periods, we used the meta-analysis method to calculate a total effect size from the presented values and considered it in the analysis. Additionally, for studies where the effect size was not reported, but information about exposure and outcome was available, we estimated the effect size and the relevant 95% confidence interval (CI) and included it in the meta-analysis.

To assess the presence of heterogeneity in the studies included in the meta-analysis, we used statistical tests (Chi-square test and  $I^2$  to report a quantitative amount of heterogeneity) and graphical methods (forest plot). The Chi-square test was used to investigate differences in the results of the studies entered in the meta-analysis, and the results of this test determined the type of model (fixed or random). We used the met-regression model to determine the factors related to heterogeneity in the results, taking into account variables such as study sample size, article quality evaluation score based on the Newcastle-Ottawa, study design, sex ratio (male-to-female) of participants, and year of the study. We also used sensitivity analysis to evaluate the effect of omitting each study on the final result. Funnel plots and Begg's and Egger's tests were used to assess publication bias. We used the Metatarium command to estimate the effect size of the relation in the missing studies. All analyses were performed using Stata statistical software (version 15.0, Stata Corp, College Station, TX), and the significance level in this study was considered to be less than 0.05.

## Results

### Articles included in the study

As shown in Fig 1, an electronic search of databases using keywords in the title or abstract yielded 2060 articles, of which 563 duplicates were removed, resulting in 1497 articles. After scrutinizing each title, 1448 articles were excluded as being unrelated to the research topic, leaving 49 potentially relevant papers. Upon further examination, one article was excluded due to a lack of access to the full text, four articles were excluded due to a lack of effect size reporting, one article was excluded as a review, and one article was excluded due to the calculation of the time of occurrence, leaving a total of 42 articles to be included in the study (Fig 1).

### Characteristics of selected studies

This review included a total of 42 articles investigating the association between diabetes and the occurrence of carpal tunnel syndrome, with a combined study population of 3,377,816 participants between 1991 and 2022 [3, 5, 17, 19, 21–34, 36–59]. Geographically, 15 studies with 1,332,085 participants were conducted in America, 12 studies with 19,792 participants were carried out in Europe, and 15 studies with 1,019,692 participants were conducted in Asia. In terms of study types, the review included 23 case-control, 12 cross-sectional, and 7 cohort studies. Among the 42 articles, 18 were categorized as being of low quality, 16 were categorized as being of medium quality, and 8 were categorized as being of good quality, as shown in Tables 1–3.

### Association between diabetes and CTS

The results of the meta-analysis of the 42 studies showed that the odds ratio (OR) of CTS in participants who had a history of diabetes compared to those who did not was 1.90 (95% CI: 1.64–2.21; P-value <0.001). In other words, the results of this meta-analysis demonstrate that diabetes increased the odds of carpal tunnel syndrome by 90%, which is statistically significant (Fig 2).

### Evaluation of publication bias

In investigating the relationship between diabetes and the occurrence of CTS using Begg's test (P-value = 0.01), there is a publication bias. No publication bias was observed using the Egger's test (P-value = 0.65). The corresponding funnel diagram can be seen in Fig 3.

In light of Begg's test indicating a publication bias in this study, we used the Metatarium command to estimate the effect size of the relationship between diabetes and CTS in the

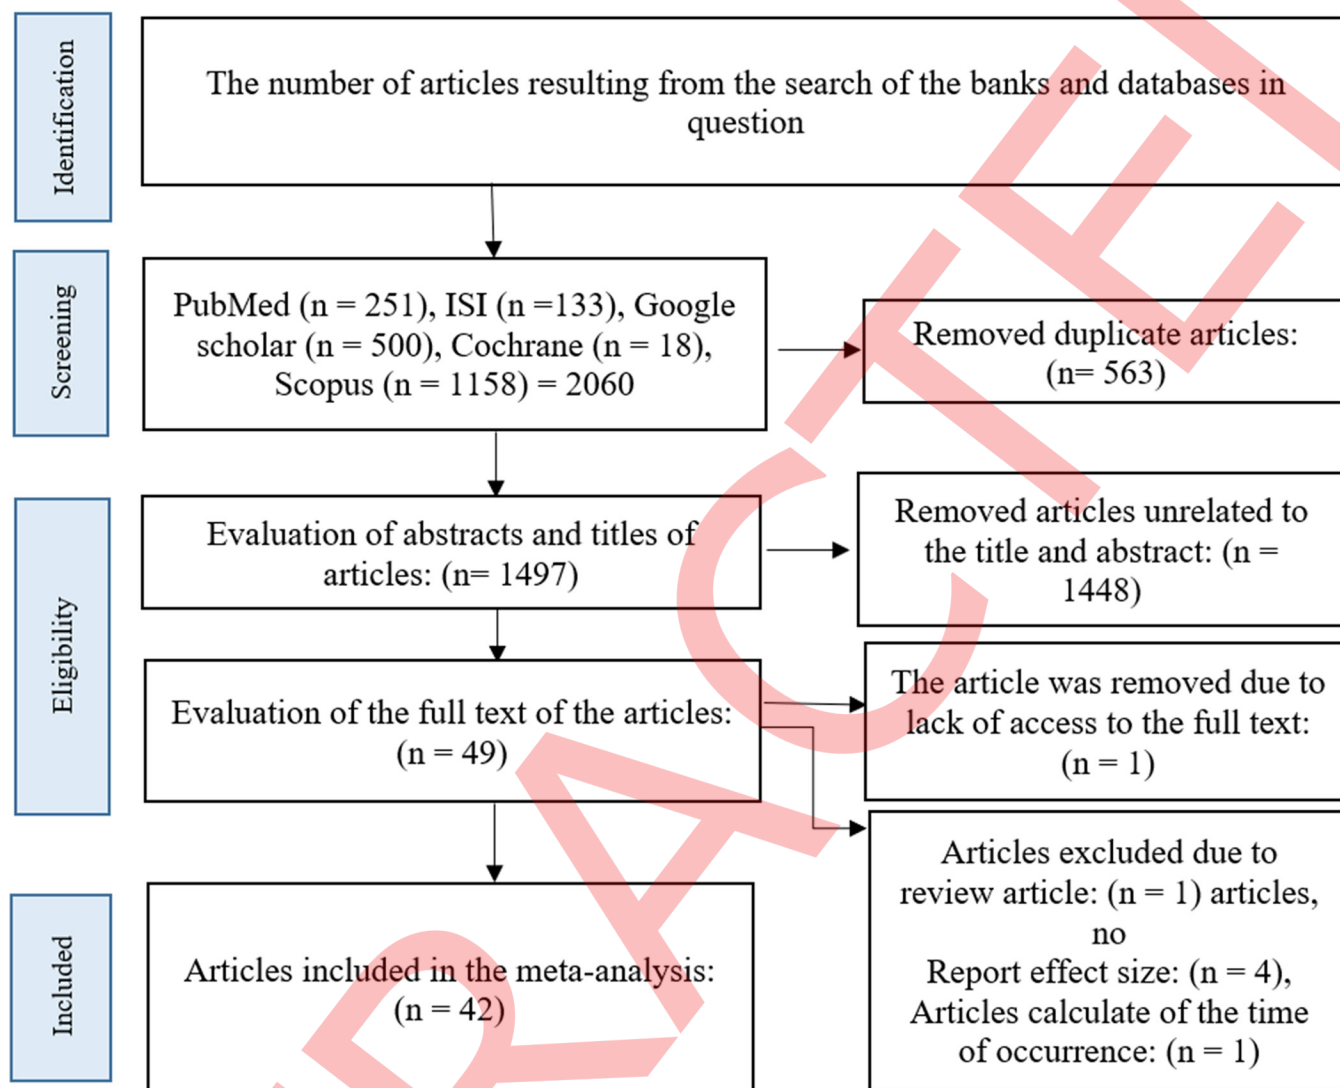

Fig 1. Diagram of selected studies for meta-analysis.

<https://doi.org/10.1371/journal.pone.0299442.g001>

missing studies and included it in the final calculations (Fig 4). Based on the results of the four missing studies estimated in this phase, the final modified odds ratio was 1.68 (95% CI: 1.45–1.94; P-value ≤ 0.001).

### Meta-regression and sensitivity analysis

A meta-regression was performed with the following variables included to investigate the cause of heterogeneity in study results: year, study design, sample size, quality of study based on the Newcastle-Ottawa, and sex ratio (male to female) of participants. According to the meta-regression results, the sex ratio (male to female) was the only variable that significantly contributed to the heterogeneity in the results of the studies analysed. Studies with a higher proportion of men (male to female ratio greater than 1) had a lower odds ratio of CTS occurrence than studies with a higher proportion of women (Table 4).



Table 1. Characteristics of meta-analysis studies to investigate the relationship between diabetes and CTS.

| Number | Publication first author   | Year | Study setting | Study design    | OR                 | Quality assessment |
|--------|----------------------------|------|---------------|-----------------|--------------------|--------------------|
| 1      | Rocks MC [25]              | 2022 | USA           | Case-control    | 1.77 (1.62–1.93)   | 5                  |
| 2      | Rydberg M [26]             | 2022 | Sweden        | Cross-sectional | 3.35 (2.51–4.48)   | 3                  |
| 3      | Kim JH [34]                | 2021 | South Korea   | Cross-sectional | 1.75 (0.47–6.51)   | 4                  |
| 4      | Low J [36]                 | 2021 | USA           | Cross-sectional | 0.84 (0.65–1.09)   | 6                  |
| 5      | Naha U [51]                | 2021 | USA           | cross sectional | 0.95 (0.32–2.79)   | 5                  |
| 6      | Rhee SY [55]               | 2021 | South Korea   | Cohort          | 1.04 (0.97–1.11)   | 6                  |
| 7      | Rydberg M [56]             | 2020 | Sweden        | Cohort          | 2.52 (1.99–3.19)   | 7                  |
| 8      | Shen PC [57]               | 2019 | Taiwan        | Case-control    | 1.32 (1.25–1.40)   | 4                  |
| 9      | Bhandari D [38]            | 2017 | India         | Case-control    | 0.84 (0.47–1.50)   | 4                  |
| 10     | Hou WH [44]                | 2017 | Taiwan        | Cross-sectional | 1.34 (1.19–1.50)   | 3                  |
| 11     | Kim YH [48]                | 2017 | Korea         | Cross-sectional | 1.47 (0.75–2.90)   | 4                  |
| 12     | Hou WH [43]                | 2016 | Taiwan        | Case-control    | 1.31 (1.22–1.40)   | 5                  |
| 13     | Oktayglu P [52]            | 2015 | Case-control  | case control    | 6.92 (3.77–12.71)  | 4                  |
| 14     | Hendriks SH [42]           | 2014 | Netherlands   | Case-control    | 1.77 (1.22–2.57)   | 3                  |
| 15     | Musolin K [19]             | 2014 | USA           | Cross-sectional | 1.54 (1.03–2.31)   | 4                  |
| 16     | Harris-Adamson C [41]      | 2013 | USA           | Cohort          | 1.08 (1.03–2.31)   | 5                  |
| 17     | Pandey A [53]              | 2013 | India         | Case-control    | 3.45 (1.58–7.53)   | 4                  |
| 18     | Wessel LE [59]             | 2013 | Washington    | Cohort          | 1.88 (1.08–3.25)   | 5                  |
| 19     | Evanoff B [33]             | 2013 | USA           | Cohort          | 2.06 (0.48–9.21)   | 5                  |
| 20     | Kidwai SS [47]             | 2013 | Pakistan      | Case-control    | 4.94 (1.65–14.80)  | 3                  |
| 21     | Karadag O [45]             | 2012 | USA           | case control    | 7.01 (1.86–26.40)  | 3                  |
| 22     | Tseng CH [5]               | 2012 | Taiwan        | Cohort          | 3.58 (3.05–4.20)   | 7                  |
| 23     | Ravindran Rajendran S [54] | 2011 | Chandigarh    | Case-control    | 5.66 (1.24–25.87)  | 4                  |
| 24     | Shiri R [32]               | 2011 | Finland       | Cross-sectional | 1.10 (0.61–1.99)   | 9                  |
| 25     | Plastino M [24]            | 2011 | Case-control  | case control    | 8.36 (4.65–15.03)  | 7                  |
| 26     | Mattioli S [49]            | 2009 | Italy         | case control    | 2.60 (0.74–9.17)   | 5                  |
| 27     | Melchior M [50]            | 2006 | France        | Cross-sectional | 1.92 (0.95–3.89)   | 6                  |
| 28     | Mondelli M [31]            | 2006 | Italy         | Case-control    | 5.51 (0.26–116.79) | 4                  |
| 29     | Gell N [40]                | 2005 | Michigan      | Cohort          | 7.28 (1.27–41.62)  | 8                  |
| 30     | Geoghegan JM [3]           | 2004 | UK            | Cross-sectional | 1.79 (1.24–2.58)   | 5                  |
| 31     | Ardic F [30]               | 2003 | Turkey        | Case-control    | 0.48 (0.02–9.01)   | 3                  |
| 32     | Karpitskaya Y [46]         | 2002 | Washington    | Case-control    | 3.05 (1.08–8.61)   | 5                  |
| 33     | Cagliero E [17]            | 2002 | USA           | case control    | 1.56 (0.67–3.63)   | 4                  |
| 34     | Ferry S [29]               | 2000 | UK            | Case-control    | 1.83 (0.68–4.95)   | 4                  |
| 35     | Solomon DH [58]            | 1999 | Washington    | Case-control    | 1.40 (1.14–1.71)   | 3                  |
| 36     | Awada A [23]               | 1998 | Saudi Arabia  | Case-control    | 4.51 (2.91–6.99)   | 3                  |
| 37     | Atcheson SG [37]           | 1998 | USA           | Cross-sectional | 3.98 (0.88–17.95)  | 4                  |
| 38     | Chammas M [39]             | 1995 | France        | Case-control    | 0.06 (0.02–0.19)   | 5                  |
| 39     | Florack TM [22]            | 1992 | USA           | Cross-sectional | 5.63 (1.17–27.09)  | 3                  |
| 40     | De krom M [28]             | 1990 | Netherlands   | Case-control    | 2.34 (0.50–10.88)  | 4                  |
| 41     | Wieslonder G [27]          | 1989 | Sweden        | Case-control    | 1.42 (0.27–7.43)   | 5                  |
| 42     | Dieck GS [21]              | 1985 | USA           | Case-control    | 2.90 (1.30–6.48)   | 5                  |

<https://doi.org/10.1371/journal.pone.0299442.t001>

## Sensitivity analysis

Sensitivity analysis was carried out by removing each study from the analysis one by one during each run. However, the estimated OR did not vary considerably, indicating that the meta-analysis results were robust (Table 5).

Table 2. Demographic composition of the participants in the included studies.

| Number | Publication first author   | Year  | Sample size | Men/women     | Age average | With CTS/without CTS | With diabetes/without diabetes |
|--------|----------------------------|-------|-------------|---------------|-------------|----------------------|--------------------------------|
| 1      | Rocks MC [25]              | 2022  | 997541      | 408487/589054 | 52.52       | 5726/991815          | 59166/938375                   |
| 2      | Rydberg M [26]             | 2022  | 1099543     | 545735/553808 | -           | 30475/106068         | 56207/1014336                  |
| 3      | Kim JH [34]                | 2021  | 43          | 23/20         | 60.4        | 19/24                | 14/29                          |
| 4      | Low J [36]                 | 2021  | 322092      | 20503/23018   | -           | 1775/320317          | 43521/278571                   |
| 5      | Naha U [51]                | 2021  | 292         | 292           | -           | 41/251               | 138/154                        |
| 6      | Rhee SY [55]               | 2021  | 476586      | 264686/211900 | -           | 7258/469328          | 963/60516                      |
| 7      | Rydberg M [56]             | 2020  | 30446       | 12099/18347   | 57          | 1204/29242           | 1378/29067                     |
| 8      | Shen PC [57]               | 2019  | 41871       | 21307/20564   | -           | 31928/9943           | 19494/22377                    |
| 9      | Bhandari D [38]            | 2017  | 411         | 87/324        | 47.6        | 137/274              | 66/345                         |
| 10     | Hou WH [44]                | 2017  | 114186      | 57816/56370   | -           | -                    | 57093/57093                    |
| 11     | Kim YH [48]                | 2017  | 230         | 81/119        | 52.81       | 105/125              | 41/189                         |
| 12     | Hou WH [43]                | 2016  | 201348      | 107392/93956  | -           | 9025/192323          | 33571/167855                   |
| 13     | Oktayglu P [52]            | 2015  | 216         | 93/123        | 45.94       | 96/120               | 87/129                         |
| 14     | Hendriks SH [42]           | 2014  | 1591        | 558/1003      | 53.31       | 997/594              | 158/1433                       |
| 15     | Musolin K [19]             | 2014  | 318         | 94/224        | 39          | 127/191              | 17/301                         |
| 16     | Harris-Adamson C [41]      | 2013  | 3515        | 1860/1654     | -           | 190/3007             | 122/3075                       |
| 17     | Pandey A [53]              | 2013  | 400         | 199/201       | 52.45       | 37/363               | 200/200                        |
| 18     | Wessel LE [59]             | 2013  | 300         | 300           | -           | 84/216               | -                              |
| 19     | Evanoff B [33]             | 2013  | 711         | 458/253       | 30.6        | 31/680               | 24/687                         |
| 20     | Kidwai SS [47]             | 2013  | 413         | 143/270       | 50.11       | 23/390               | 210/203                        |
| 21     | Karadag O [45]             | 2012  | 100         | 22/78         | 49.59       | 19/81                | 11/89                          |
| 22     | Tseng CH [5]               | 2012  | 47406       | 21951/25455   | -           | 15802/31604          | 662/46744                      |
| 23     | Ravindran Rajendran S [54] | 2011  | 409         | 204/205       | 52.92       | 13/396               | 206/203                        |
| 24     | Shiri R [32]               | 2011  | 6254        | 6254          | 51.9        | 238/6016             | 353/5880                       |
| 25     | Plastino M [24]            | 2011  | 245         | 125/120       | -           | 117/128              | 136/109                        |
| 26     | Mattioli S [49]            | 2009  | 567         | 97/470        | 48.6        | 220/356              | 15/461                         |
| 27     | Melchior M [50]            | 2006  | 2656        | 1549/1107     | -           | 79/2577              | 43/2613                        |
| 28     | Mondelli M [31]            | 2006  | 145         | 145           | 39.6        | 70/75                | 2/143                          |
| 29     | Gell N [40]                | 2005  | 432         | 134/298       | 37.47       | 29/403               | 6/426                          |
| 30     | Geoghegan JM [3]           | 2004  | 16955       | 4735/12221    | -           | 3391/13564           | 494/16461                      |
| 31     | Ardic F [30]               | 2003  | 115         | 33/82         | 57.12       | 2/113                | 78/37                          |
| 32     | Karpitskaya Y [46]         | 2002  | 614         | 248/366       | 49.51       | 514/100              | 62/552                         |
| 33     | Cagliero E [17]            | 2002  | 300         | 186/114       | 50          | 32/268               | 200/100                        |
| 34     | Ferry S [29]               | 2000  | 2528        | 2528          | 41.9        | 1264/1264            | 17/2511                        |
| 35     | Solomon DH [58]            | 1999  | 4244        | 1096/3148     | -           | 627/3740             | 849/3395                       |
| 36     | Awada A [23]               | 1998  | 240         | 68/132        | -           | 100/100              | 30/170                         |
| 37     | Atcheson SG [37]           | 1998  | 297         | -             | -           | 193/104              | 16/281                         |
| 38     | Chammas M [39]             | 1995  | 240         | 162/78        | -           | 44/196               | 120/120                        |
| 39     | Florack TM [22]            | 19922 | 246         | 33/213        | -           | 106/140              | 10/236                         |
| 40     | De krom M [28]             | 1990  | 501         | 164/337       | -           | 28/473               | 17/484                         |
| 41     | Wieslender G [27]          | 1989  | 177         | 177           | -           | 34/143               | 8/169                          |
| 42     | Dieck GS [21]              | 1985  | 1083        | 1083          | -           | 40/1043              | 90/977                         |

<https://doi.org/10.1371/journal.pone.0299442.t002>

### Subgroup analysis

To determine the reason for the heterogeneity, subgroup analysis was performed and studies based on sample size (more or less than 10,000 participants), study design, study location, time period, sex ratio (male/female) of participants, qualitative evaluation score of articles, and the

**Table 3. Adjusted variables in the studies that investigate the relationship between diabetes and CTS.**

| <i>Publication first author</i> | <i>Year</i> | <i>Study setting</i>                                                                                                                          |
|---------------------------------|-------------|-----------------------------------------------------------------------------------------------------------------------------------------------|
| Kim JH                          | 2021        | Age, sex, WFR                                                                                                                                 |
| Low J                           | 2021        | Age, sex, tobacco use, obesity, hypothyroid, CKD                                                                                              |
| Rhee SY                         | 2021        | Age, sex, BMI, Rheumatoid arthritis, Raynaud's syndrome                                                                                       |
| Rydberg M                       | 2022        | Age, sex, BMI, Hypertension, smoking, Alcohol consumption, Antihypertensive treatment                                                         |
| Bhandari D                      | 2017        | Age, sex, education, smoking, current tobacco chewing, past smoking, past tobacco chewing, family history, obesity, Short Stature             |
| Hendriks SH                     | 2014        | Sex, age, BMI                                                                                                                                 |
| Harris-Adamson C                | 2013        | Sex, age, and BMI                                                                                                                             |
| Pandey A                        | 2013        | Age, sex                                                                                                                                      |
| Wessel LE                       | 2013        | Age, sex, smoking                                                                                                                             |
| Evanoff B                       | 2013        | Age, BMI, sex                                                                                                                                 |
| Kidwai SS                       | 2013        | Age, sex                                                                                                                                      |
| Tseng CH                        | 2012        | Sex, age, occupation, urbanization, income, uremia, Vit. B6 deficiency, RA, hypothyroidism, obesity, hypertension, diabetes, Gout, Acromegaly |
| Ravindran Rajendran S           | 2011        | Age, sex, job types                                                                                                                           |
| Shiri R                         | 2011        | Age, sex, education, somatisation, hand grip with high forces, and work using vibrating tools                                                 |
| Plastino M                      | 2011        | Sex                                                                                                                                           |
| Mattioli S                      | 2009        | Socio-occupational status, BMI, height, age, center                                                                                           |
| Melchior M                      | 2006        | Age                                                                                                                                           |
| Mondelli M                      | 2006        | Age, BMI, hobbies, Oral contraceptives, other diseases, Current job length                                                                    |
| Geoghegan JM                    | 2004        | BMI, diabetes, thyroxine, rheumatoid, OA, HRT, COCP, Smoking, Corticosteroids                                                                 |
| Ferry S                         | 2000        | Age, date of birth                                                                                                                            |
| Solomon DH                      | 1999        | Age, gender, inflammatory arthritis, diabetes, hypothyroidism, hemodialysis, corticosteroid use, Estrogen replacement use                     |
| Chammas M                       | 1995        | Age, sex                                                                                                                                      |

<https://doi.org/10.1371/journal.pone.0299442.t003>

state of adjustment of confounding variables in the study were assessed. The odds ratio of CTS in people with diabetes compared to people without a history of diabetes was reported as 2.04 (95% CI: 1.69–2.46) in case-control studies, 1.61 (95% CI: 1.20–2.17) in cross-sectional studies, 2.06 (95% CI: 1.10–3.86) in cohort studies, 1.69 (95% CI: 1.33–2.15) in America, 2.04 (95% CI: 1.37–3.05) in Europe, 1.78 (95% CI: 1.43–2.23) in Asia, 1.95 (95% CI: 1.30–2.92) in studies before 2010, 1.88 (95% CI: 1.59–2.23) in studies after 2010, 1.75 (95% CI: 1.28–2.40) in adjusted studies (the role of confounding variables is controlled), 1.94 (95% CI: 1.65–2.29) in unadjusted studies, 2.37 (95% CI: 1.59–3.53) in studies with a sample size of less than thousand participants, 1.65 (95% CI: 1.39–1.94) in studies with sample size a larger or equal to thousand participants, 2.35 (95% CI: 1.86–2.98) in studies with a gender ratio of less than one, 1.36 (95% CI: 1.14–1.63) in studies with a gender ratio equal to or greater than one, 2.49 (95% CI: 1.88–3.92) in studies categorized in good quality group, 1.41 (95% CI: 1.19–1.68) in studies categorized in moderate quality group, and 2.16 (95% CI: 1.24–3.74) in studies categorized in poor quality group (Table 6).

## Discussion

The purpose of this study was to investigate the relationship between diabetes and the occurrence of CTS. In this study, it was observed that compared to people without diabetes, the



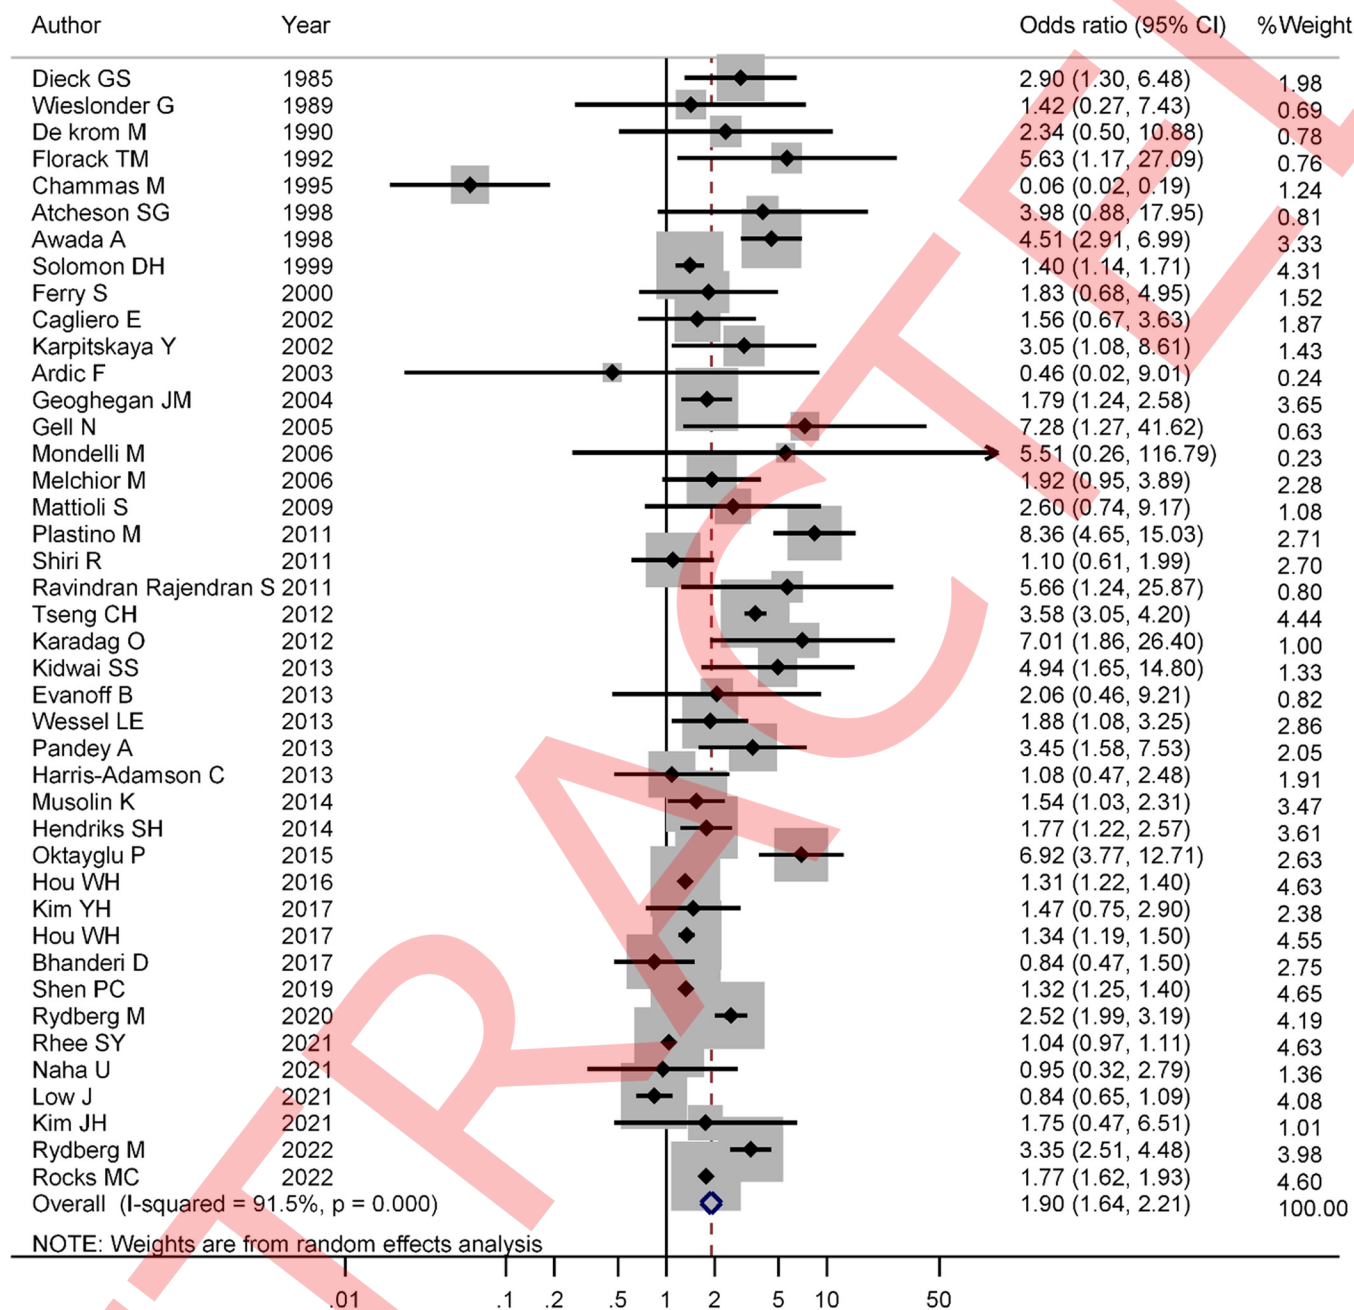

Fig 2. Forest plot of the relationship between diabetes and CTS.

<https://doi.org/10.1371/journal.pone.0299442.g002>

odds ratio of the occurrence of CTS in diabetic patients is equal to 1.90 (95% CI: 1.64–2.21; P-value <0.001). Since in this study, the heterogeneity between the results of the studies included in the analysis is 91.5%, the meta-regression approach was used to identify the root of the heterogeneity. According to the meta-regression results, the sex ratio was the only variable that significantly contributed to the heterogeneity in the results of the studies analysed. So, studies with a higher proportion of men had a lower odds ratio of carpal tunnel syndrome occurrence than studies with a higher proportion of women.

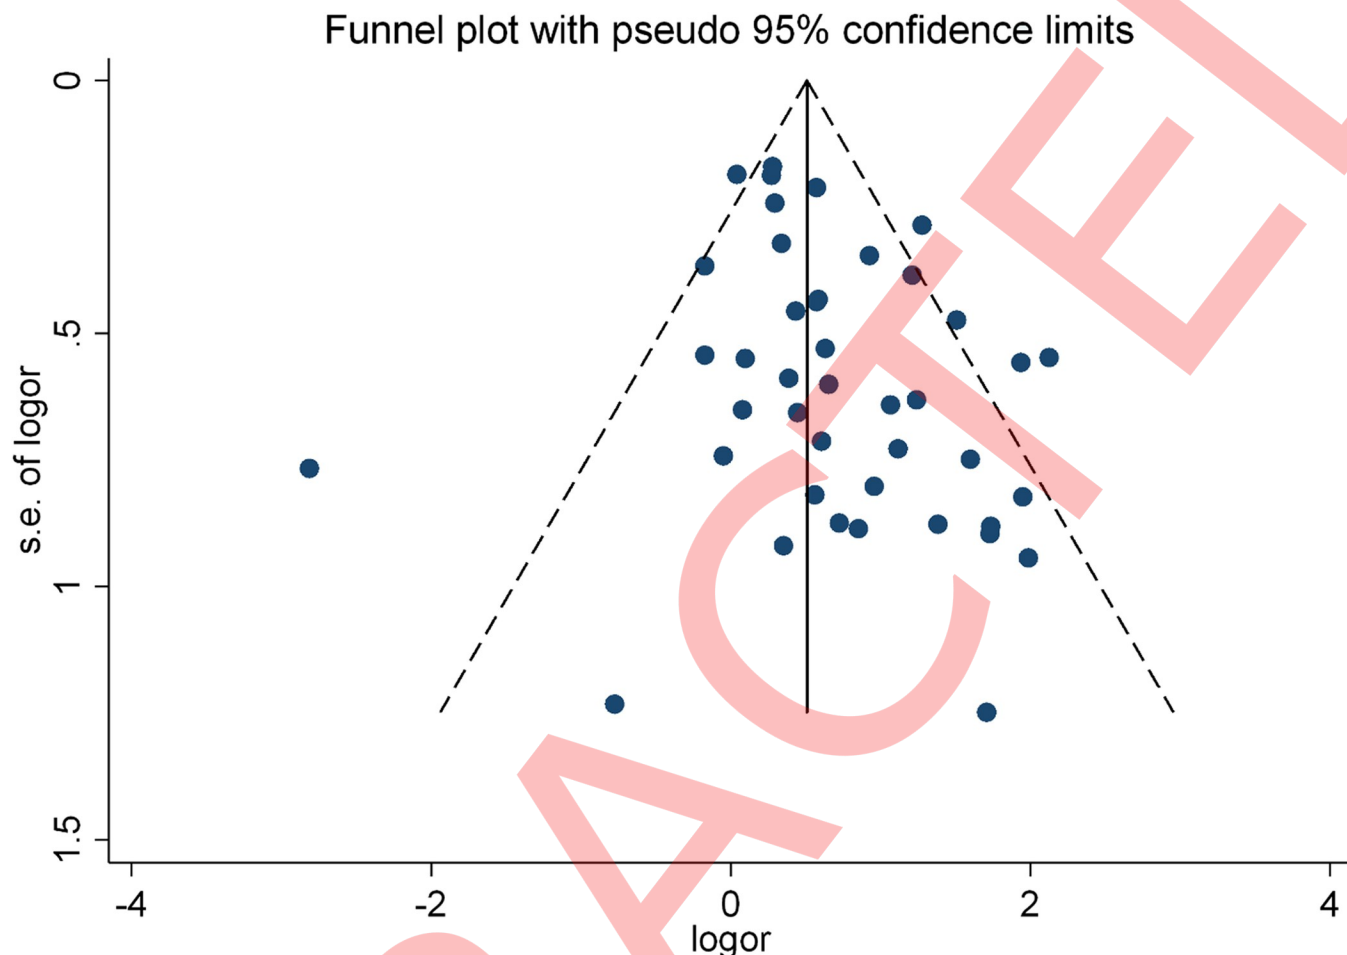

Fig 3. Funnel plot for evaluation of publication bias in investigating the relationship between diabetes and CTS.

<https://doi.org/10.1371/journal.pone.0299442.g003>

This study uncovered the presence of publication bias, which aims to amplify the dissemination of research findings indicating an increased risk of carpal tunnel syndrome in individuals with diabetes. To address this, we attempted to estimate the effect size of the missing studies and included it in our calculations. By estimating the effect size of diabetes on the occurrence of CTS and considering the results of the four missing studies, we arrived at a final modified odds ratio of 1.68 (95% CI: 1.45–1.94;  $P\text{-value} \leq 0.001$ ). Despite controlling for the effect of publication bias in the final meta-analysis, diabetes still poses an increased risk of CTS occurrence.

In a systematic review and meta-analysis conducted by Pourmemari MH and Shiri R, in 2016 on the relationship between diabetes and CTS, it was found that the crude odds ratio was 1.97 (95% CI: 1.56–2.49), while the adjusted odds ratio for confounding variables was 1.69 (95% CI: 1.45–1.96). In addition, in this study, no difference was observed between type 1 and type 2 diabetes in the development of CTS, in fact, both type 1 and type 2 diabetes are related to the occurrence of CTS [4]. The results of this study are consistent with the findings of our study.

A large population-based investigation revealed that diabetic individuals have a higher incidence of CTS, with an odds ratio of 1.51 that is independent of other risk variables. The increased prevalence of CTS in diabetic individuals may begin up to ten years before the

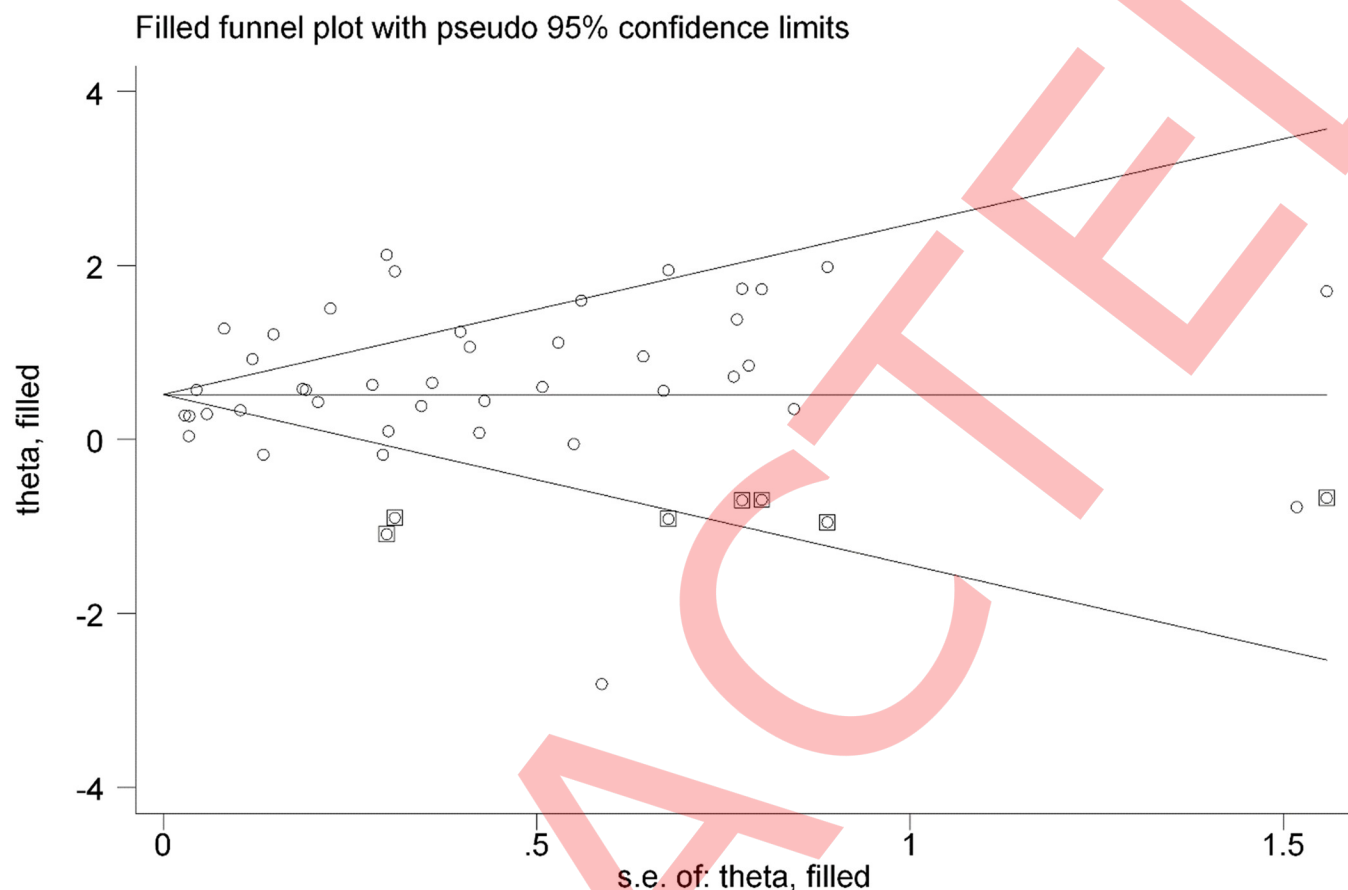

Fig 4. The results of the four missing studies estimated using the Metatarium command.

<https://doi.org/10.1371/journal.pone.0299442.g004>

diagnosis of diabetes [60]. Bilateral CTS has been observed to be more common in diabetic individuals, with its prevalence linked to increasing age and body mass index [61]. Therefore, it appears that in diabetic individuals, the presence of special conditions and characteristics such as older age and higher body mass index create a positive interaction, leading to the occurrence of CTS and its higher prevalence in this group.

Table 4. Meta-regression results in the studies that investigate the relationship between diabetes and carpal tunnel syndrome.

| Meta-regression                                |            |           |       |       | Number of obs = 38                |            |
|------------------------------------------------|------------|-----------|-------|-------|-----------------------------------|------------|
| REML estimate of between-study variance        |            |           |       |       | Tau <sup>2</sup> = 0.4471         |            |
| % residual variation due to heterogeneity      |            |           |       |       | I-squared <sub>res</sub> = 87.71% |            |
| Proportion of between—study variance explained |            |           |       |       | Adj R-squared = 1.76%             |            |
| Joint test for all covariates                  |            |           |       |       | Model F (5,32) = 1.42             |            |
| With Knapp-Hartung modification                |            |           |       |       | Prob>F = 0.2431                   |            |
| logor                                          | Coef.      | Std. Err. | t     | p   t | [95% Conf. Interval]              |            |
| Year                                           | 0.2241241  | 0.2812747 | 0.80  | 0.431 | 0.3488138                         | 0.797062   |
| Sample size                                    | -0.3452252 | 0.2802587 | -1.23 | 0.227 | 0.9160934                         | 0.2256431  |
| Sex ratio                                      | -0.6181865 | 0.2963283 | -2.09 | 0.045 | 1.0221788                         | -0.0145855 |
| Study design                                   | -0.0615807 | 0.1565388 | -0.39 | 0.697 | 0.3804398                         | 0.2572784  |
| Quality assessment                             | 0.065364   | 0.1864653 | 0.35  | 0.728 | 0.3144533                         | 0.4451814  |
| -cons                                          | 1.671189   | 0.6622751 | 2.52  | 0.017 | 0.3221792                         | 3.020199   |

<https://doi.org/10.1371/journal.pone.0299442.t004>

Table 5. Results of sensitivity analysis for the assessment of the relationship between diabetes and CTS.

| <i>Publication first author</i> | <i>Year</i> | <i>OR (95% CI)</i> |
|---------------------------------|-------------|--------------------|
| Rocks MC                        | 2022        | 1.91 (1.63–2.24)   |
| Rydberg M                       | 2022        | 1.85 (1.59–2.15)   |
| Kim JH                          | 2021        | 1.90 (1.63–2.21)   |
| Low J                           | 2021        | 1.96 (1.69–2.29)   |
| Naha U                          | 2021        | 1.92 (1.65–2.23)   |
| Rhee SY                         | 2021        | 1.96 (1.68–2.28)   |
| Rydberg M                       | 2020        | 1.87 (1.61–2.18)   |
| Shen PC                         | 2019        | 1.95 (1.64–2.32)   |
| Bhandari D                      | 2017        | 1.94 (1.67–2.26)   |
| Hou WH                          | 2017        | 1.94 (1.65–2.27)   |
| Kim YH                          | 2017        | 1.91 (1.64–2.22)   |
| Hou WH                          | 2016        | 1.95 (1.65–2.30)   |
| Oktayglu P                      | 2015        | 1.83 (1.58–2.12)   |
| Hendriks SH                     | 2014        | 1.90 (1.63–2.22)   |
| Musolin K                       | 2014        | 1.91 (1.64–2.23)   |
| Harris-Adamson C                | 2013        | 1.92 (1.65–2.23)   |
| Pandey A                        | 2013        | 1.87 (1.61–2.18)   |
| Wessel LE                       | 2013        | 1.90 (1.63–2.21)   |
| Evanoff B                       | 2013        | 1.90 (1.63–2.20)   |
| Kidwai SS                       | 2013        | 1.87 (1.61–2.18)   |
| Karadag O                       | 2012        | 1.88 (1.61–2.18)   |
| Tseng CH                        | 2012        | 1.82 (1.58–2.08)   |
| Ravindran Rajendran S           | 2011        | 1.88 (1.62–2.19)   |
| Shiri R                         | 2011        | 1.93 (1.66–2.24)   |
| Plastino M                      | 2011        | 1.82 (1.57–2.11)   |
| Mattioli S                      | 2009        | 1.89 (1.63–2.20)   |
| Melchior M                      | 2006        | 1.90 (1.63–2.21)   |
| Mondelli M                      | 2006        | 1.89 (1.63–2.20)   |
| Gell N                          | 2005        | 1.88 (1.62–2.19)   |
| Geoghegan JM                    | 2004        | 1.90 (1.63–2.22)   |
| Ardic F                         | 2003        | 1.90 (1.64–2.21)   |
| Karpitskaya Y                   | 2002        | 1.88 (1.62–2.19)   |
| Cagliero E                      | 2002        | 1.91 (1.64–2.21)   |
| Ferry S                         | 2000        | 1.90 (1.63–2.21)   |
| Solomon DH                      | 1999        | 1.93 (1.65–2.25)   |
| Awada A                         | 1998        | 1.84 (1.58–2.13)   |
| Atcheson SG                     | 1998        | 1.89 (1.62–2.19)   |
| Chammas M                       | 1995        | 1.98 (1.70–2.29)   |
| Florack TM                      | 1992        | 1.88 (1.62–2.19)   |
| De krom M                       | 1990        | 1.89 (1.63–2.20)   |
| Wieslender G                    | 1989        | 1.90 (1.64–2.21)   |
| Dieck GS                        | 1985        | 1.88 (1.62–2.19)   |

<https://doi.org/10.1371/journal.pone.0299442.t005>

Research has indicated that CTS does not predict diabetes, but rather, diabetes predicts CTS [62]. According to the study conducted with Perkins et al., the prevalence of clinical CTS was 14% in diabetic patients without diabetic peripheral neuropathy (DPN), 30% in those with DPN, and 2% in the general population. They also found that CTS, is common in individuals with distal sensory peripheral neuropathy [63].

Table 6. Subgroup analysis of the association between diabetes and CTS.

| Characteristics                     | Number of studies | OR (95% CI) | P-value          |
|-------------------------------------|-------------------|-------------|------------------|
| Study design                        | Case-control      | 23          | 2.04 (1.69–2.46) |
|                                     | Cross-sectional   | 12          | 1.61 (1.20–2.17) |
|                                     | Cohort            | 7           | 2.06 (1.10–3.86) |
| Study location                      | America           | 15          | 1.69 (1.33–2.15) |
|                                     | Europe            | 15          | 2.04 (1.37–3.05) |
|                                     | Asia              | 12          | 1.78 (1.43–2.23) |
| Time period                         | Before 2010       | 17          | 1.95 (1.30–2.92) |
|                                     | After 2010        | 25          | 1.88 (1.59–2.23) |
| Sample size                         | <1000             | 25          | 2.37 (1.59–3.53) |
|                                     | ≥1000             | 17          | 1.65(1.39–1.94)  |
| Adjustment of confounding variables | No                | 20          | 1.94(1.65–2.29)  |
|                                     | Yes               | 22          | 1.75(1.28–2.40)  |
| Sex ratio                           | Unknown           | 8           | 1.69(1.24–2.30)  |
|                                     | <1                | 23          | 2.35(1.86–2.98)  |
|                                     | ≥1                | 11          | 1.36(1.14–1.63)  |
| Quality assessment                  | Good quality      | 5           | 2.49 (1.88–3.29) |
|                                     | Moderate quality  | 27          | 1.41 (1.19–1.68) |
|                                     | Poor quality      | 10          | 2.16 (1.24–3.74) |

<https://doi.org/10.1371/journal.pone.0299442.t006>

While the adverse effects of diabetes on peripheral nerves have been extensively studied, the mechanism by which diabetes increases the risk of CTS is still being investigated. Median nerve neuropathy is a common complication of diabetes. Patients with diabetes who are not exposed to nerve compression have been found to have a reduction in myelinated nerve fibre and endoneurial capillary densities, which may lead to median nerve neuropathy [64]. In addition, advanced glycation end-products have been found to increase production of circulating inflammatory cytokines in patients with diabetes, while vascular endothelial growth factor may cause impaired microvascular circulation, resulting in demyelination and axonal degeneration in the median nerve [65, 66]. However, further research is still needed to fully understand the underlying mechanisms of CTS caused by diabetes.

Our study consisted of 42 observational studies (case-control, cross-sectional, and cohort). The results of this study can be highly beneficial for health professionals in making well-informed decisions and adopting evidence-based preventive measures for patients with diabetes. In this research, subgroup analysis was used to present the results in greater detail. However, this study has some limitations. One of the most important limitations of this study is that all the studies included in the analysis are observational. One limitation of observational studies is the presence of confounding variables when examining the relationship between exposure and outcome. While these studies attempt to control for confounding variables through methods such as matching or statistical methods like classification or regression models, there is still the possibility of residual confounders in these studies. Therefore, caution should be exercised when interpreting the results of observational studies and meta-analyses based on these studies. Consequently, it is not possible to infer causal inference relationships between exposure and outcome in these studies, and should only interpret the relationship between variables [67].

## Conclusion

This study observes that diabetes is related to the occurrence of CTS, with diabetic patients having a 90% higher odds of developing the condition compared to non-diabetic individuals.



Therefore, health policies and recommendations should pay special attention to the risk of CTS in diabetic people. Periodic evaluations should also be considered for diabetic patients to prevent the occurrence of this disorder and its related disabilities.

## Supporting information

**S1 File.**  
(DOCX)

## Author Contributions

**Conceptualization:** Elaheh Sanjari, Lusine G. Khachatryan.

**Data curation:** Lusine G. Khachatryan, Abdollah Mohammadian-Hafshejani.

**Formal analysis:** Lusine G. Khachatryan.

**Investigation:** Elaheh Sanjari, Abdollah Mohammadian-Hafshejani.

**Methodology:** Abdollah Mohammadian-Hafshejani.

**Project administration:** Abdollah Mohammadian-Hafshejani.

**Software:** Abdollah Mohammadian-Hafshejani.

**Validation:** Abdollah Mohammadian-Hafshejani.

**Visualization:** Hadi Raeisi Shahraki, Abdollah Mohammadian-Hafshejani.

**Writing – original draft:** Elaheh Sanjari, Hadi Raeisi Shahraki, Lusine G. Khachatryan, Abdollah Mohammadian-Hafshejani.

**Writing – review & editing:** Hadi Raeisi Shahraki, Lusine G. Khachatryan, Abdollah Mohammadian-Hafshejani.

## References

1. Afshar A, Tabrizi A, Tajbakhsh M, Navaeifar N. Subjective outcomes of carpal tunnel release in patients with diabetes and patients without diabetes. *Journal of Hand and Microsurgery*. 2019; 12(03):183–8. <https://doi.org/10.1055/s-0039-1697059> PMID: 33408444
2. Farzan M, Mazoochy H, Sobhani A, Shajirat Z, Zolfaghari R, Espandar R. Carpal tunnel syndrome and contributing factors in 362 hospitalized patients. *Tehran University Medical Journal*. 2012; 70(1).
3. Geoghegan J, Clark D, Bainbridge L, Smith C, Hubbard R. Risk factors in carpal tunnel syndrome. *Journal of Hand Surgery*. 2004; 29(4):315–20. <https://doi.org/10.1016/j.jhsb.2004.02.009> PMID: 15234492
4. Pourmemari M, Shiri R. Diabetes as a risk factor for carpal tunnel syndrome: a systematic review and meta-analysis. *Diabetic Medicine*. 2016; 33(1):10–6. <https://doi.org/10.1111/dme.12855> PMID: 26173490
5. Tseng CH, Liao CC, Kuo CM, Sung FC, Hsieh D, Tsai CH. Medical and non-medical correlates of carpal tunnel syndrome in a Taiwan cohort of one million. *European journal of neurology*. 2012; 19(1):91–7. <https://doi.org/10.1111/j.1468-1331.2011.03440.x> PMID: 21631646
6. van Dijk MA, Reitsma JB, Fischer JC, Sanders GT. Indications for requesting laboratory tests for concurrent diseases in patients with carpal tunnel syndrome: a systematic review. *Clinical chemistry*. 2003; 49(9):1437–44. <https://doi.org/10.1373/49.9.1437> PMID: 12928223
7. Mitake T, Iwatsuki K, Hirata H. Differences in characteristics of carpal tunnel syndrome between male and female patients. *Journal of Orthopaedic Science*. 2020; 25(5):843–6. <https://doi.org/10.1016/j.jos.2019.10.017> PMID: 31780367
8. Osiak K, Elnazir P, Walocha J, Pasternak A. Carpal tunnel syndrome: state-of-the-art review. *Folia Morphologica*. 2022; 81(4):851–62. <https://doi.org/10.5603/FM.a2021.0121> PMID: 34783004

9. Zyluk A, Puchalski P. A comparison of outcomes of carpal tunnel release in diabetic and non-diabetic patients. *Journal of Hand Surgery (European Volume)*. 2013; 38(5):485–8. <https://doi.org/10.1177/1753193412469781> PMID: 23221178
10. Zimmerman M, Gottsäter A, Dahlin LB. Carpal tunnel syndrome and diabetes—A comprehensive review. *Journal of clinical medicine*. 2022; 11(6):1674. <https://doi.org/10.3390/jcm11061674> PMID: 35329999
11. Jeon E-J. Diabetes and depression. *Yeungnam University journal of medicine*. 2018; 35(1):27–35. <https://doi.org/10.12701/yujm.2018.35.1.27> PMID: 31620567
12. Saeedi P, Petersohn I, Salpea P, Malanda B, Karuranga S, Unwin N, et al. Global and regional diabetes prevalence estimates for 2019 and projections for 2030 and 2045: Results from the International Diabetes Federation Diabetes Atlas. *Diabetes research and clinical practice*. 2019; 157:107843.
13. Baiduc RR, Helzner EP, editors. *Epidemiology of diabetes and hearing loss*. Seminars in hearing; 2019: Thieme Medical Publishers. <https://doi.org/10.1055/s-0039-1697643> PMID: 31602091
14. Cowie CC, Rust KF, Ford ES, Eberhardt MS, Byrd-Holt DD, Li C, et al. Full accounting of diabetes and pre-diabetes in the US population in 1988–1994 and 2005–2006. *Diabetes care*. 2009; 32(2):287–94.
15. Shaw JE, Sicree RA, Zimmet PZ. Global estimates of the prevalence of diabetes for 2010 and 2030. *Diabetes research and clinical practice*. 2010; 87(1):4–14. <https://doi.org/10.1016/j.diabres.2009.10.007> PMID: 19896746
16. L Murray CJ, Vos T, Lozano R, Naghavi M, Flaxman AD, Michaud C, et al. *The lancet*. 2013:2197–223.
17. Cagliero E, Apruzzese W, Perlmuter GS, Nathan DM. Musculoskeletal disorders of the hand and shoulder in patients with diabetes mellitus. *The American journal of medicine*. 2002; 112(6):487–90. [https://doi.org/10.1016/s0002-9343\(02\)01045-8](https://doi.org/10.1016/s0002-9343(02)01045-8) PMID: 11959060
18. Cederlund RI, Dahlin LB, Thomsen NO. Activity limitations before and after surgical carpal tunnel release among patients with and without diabetes. *Journal of Rehabilitation Medicine*. 2012; 44(3):261–7. <https://doi.org/10.2340/16501977-0934> PMID: 22366782
19. Musolin K, Ramsey JG, Wassell JT, Hard DL. Prevalence of carpal tunnel syndrome among employees at a poultry processing plant. *Applied ergonomics*. 2014; 45(6):1377–83. <https://doi.org/10.1016/j.apergo.2014.03.005> PMID: 24820549
20. Ramchurn N, Mashamba C, Leitch E, Arutchelvam V, Narayanan K, Weaver J, et al. Upper limb musculoskeletal abnormalities and poor metabolic control in diabetes. *European journal of internal medicine*. 2009; 20(7):718–21. <https://doi.org/10.1016/j.ejim.2009.08.001> PMID: 19818294
21. Dieck GS, Kelsey JL. An epidemiologic study of the carpal tunnel syndrome in an adult female population. *Preventive medicine*. 1985; 14(1):63–9. [https://doi.org/10.1016/0091-7435\(85\)90021-0](https://doi.org/10.1016/0091-7435(85)90021-0) PMID: 4034515
22. Florack TM, Miller RJ, Pellegrini VD, Burton RI, Dunn MG. The prevalence of carpal tunnel syndrome in patients with basal joint arthritis of the thumb. *The Journal of hand surgery*. 1992; 17(4):624–30. [https://doi.org/10.1016/0363-5023\(92\)90305-9](https://doi.org/10.1016/0363-5023(92)90305-9) PMID: 1629540
23. Awada A, Amene P, Abdulrazak M, Obeid T. Carpal Tunnel Syndrome: A prospective clinical study of one hundred cases. *Saudi medical journal*. 1998; 19(2):166–9. PMID: 27701579
24. Plastino M, Fava A, Carmela C, De Bartolo M, Ermio C, Cristiano D, et al. Insulin resistance increases risk of carpal tunnel syndrome: a case-control study. *Journal of the Peripheral Nervous System*. 2011; 16(3):186–90. <https://doi.org/10.1111/j.1529-8027.2011.00344.x> PMID: 22003933
25. Rocks MC, Donnelly MR, Li A, Glickel SZ, Catalano LW III, Posner M, Hacquebord JH. Demographics of Common Compressive Neuropathies in the Upper Extremity. *HAND*. 2022:15589447221107701.
26. Rydberg M, Zimmerman M, Gottsäter A, Svensson A-M, Eeg-Olofsson K, Dahlin LB. Diabetic hand: prevalence and incidence of diabetic hand problems using data from 1.1 million inhabitants in southern Sweden. *BMJ Open Diabetes Research and Care*. 2022; 10(1):e002614. <https://doi.org/10.1136/bmjdr-2021-002614> PMID: 35046015
27. Wieslander G, Norbäck D, Göthe C, Juhlin L. Carpal tunnel syndrome (CTS) and exposure to vibration, repetitive wrist movements, and heavy manual work: a case-referent study. *Occupational and Environmental Medicine*. 1989; 46(1):43–7.
28. De Krom M, Kester A, Knipschild P, Spaans F. Risk factors for carpal tunnel syndrome. *American journal of epidemiology*. 1990; 132(6):1102–10. <https://doi.org/10.1093/oxfordjournals.aje.a115753> PMID: 2260542
29. Ferry S, Hannaford P, Warskyj M, Lewis M, Croft P. Carpal tunnel syndrome: a nested case-control study of risk factors in women. *American journal of epidemiology*. 2000; 151(6):566–74. <https://doi.org/10.1093/oxfordjournals.aje.a010244> PMID: 10733038

30. Ardic F, Soyupek F, Kahraman Y, Yorgancioglu R. The musculoskeletal complications seen in type II diabetics: predominance of hand involvement. *Clinical rheumatology*. 2003; 22:229–33. <https://doi.org/10.1007/s10067-003-0704-7> PMID: 14505217
31. Mondelli M, Grippo A, Mariani M, Baldasseroni A, Ansuini R, Ballerini M, et al. Carpal tunnel syndrome and ulnar neuropathy at the elbow in floor cleaners. *Neurophysiologie Clinique/Clinical Neurophysiology*. 2006; 36(4):245–53. <https://doi.org/10.1016/j.neucli.2006.08.013> PMID: 17095414
32. Shiri R, Heliövaara M, Moilanen L, Viikari J, Liira H, Viikari-Juntura E. Associations of cardiovascular risk factors, carotid intima-media thickness and manifest atherosclerotic vascular disease with carpal tunnel syndrome. *BMC musculoskeletal disorders*. 2011; 12:1–12.
33. Evanoff B, Zeringue A, Franzblau A, Dale AM. Using job-title-based physical exposures from O\* NET in an epidemiological study of carpal tunnel syndrome. *Human factors*. 2014; 56(1):166–77. <https://doi.org/10.1177/0018720813496567> PMID: 24669551
34. Kim JH, Ye Bm, Kim MJ, Kim SR, Kim IY, Kim HJ, et al. Median nerve swelling is an independent risk factor of carpal tunnel syndrome in chronic hemodialysis patients. *Therapeutic Apheresis and Dialysis*. 2021; 25(5):607–12. <https://doi.org/10.1111/1744-9987.13636> PMID: 33629794
35. Wiberg A, Smillie R, Dupré S, Schmid A, Bennett D, Furniss D. Replication of epidemiological associations of carpal tunnel syndrome in a UK population-based cohort of over 400,000 people. *Journal of Plastic, Reconstructive & Aesthetic Surgery*. 2022; 75(3):1034–40.
36. Low J, Kong A, Castro G, de la Vega PR, Lozano J, Varella M. Association between diabetes mellitus and carpal tunnel syndrome: Results from the United States National Ambulatory Medical Care Survey. *Cureus*. 2021; 13(3). <https://doi.org/10.7759/cureus.13844> PMID: 33859898
37. Atcheson SG, Ward JR, Lowe W. Concurrent medical disease in work-related carpal tunnel syndrome. *Archives of Internal Medicine*. 1998; 158(14):1506–12. <https://doi.org/10.1001/archinte.158.14.1506> PMID: 9679791
38. Bhandari DJ, Mishra DG, Parikh SM, Sharma DB. Computer use and carpal tunnel syndrome: A case-control study. *Indian journal of occupational and environmental medicine*. 2017; 21(3):109. [https://doi.org/10.4103/ijoem.IJOEM\\_66\\_17](https://doi.org/10.4103/ijoem.IJOEM_66_17) PMID: 29618909
39. Chammas M, Bousquet P, Renard E, Poirier J-L, Jaffiol C, Allieu Y. Dupuytren's disease, carpal tunnel syndrome, trigger finger, and diabetes mellitus. *The Journal of hand surgery*. 1995; 20(1):109–14. [https://doi.org/10.1016/S0363-5023\(05\)80068-1](https://doi.org/10.1016/S0363-5023(05)80068-1) PMID: 7722249
40. Gell N, Werner RA, Franzblau A, Ulin SS, Armstrong TJ. A longitudinal study of industrial and clerical workers: incidence of carpal tunnel syndrome and assessment of risk factors. *Journal of occupational rehabilitation*. 2005; 15:47–55. <https://doi.org/10.1007/s10926-005-0873-0> PMID: 15794496
41. Harris-Adamson C, Eisen EA, Dale AM, Evanoff B, Hegmann KT, Thiese MS, et al. Personal and workplace psychosocial risk factors for carpal tunnel syndrome: a pooled study cohort. *Occupational and environmental medicine*. 2013; 70(8):529–37. <https://doi.org/10.1136/oemed-2013-101365> PMID: 23645610
42. Hendriks SH, van Dijk PR, Groenier KH, Houpt P, Bilo HJ, Kleefstra N. Type 2 diabetes seems not to be a risk factor for the carpal tunnel syndrome: a case control study. *BMC musculoskeletal disorders*. 2014; 15(1):1–5.
43. Hou W-H, Li C-Y, Chen L-H, Wang L-Y, Kuo L-C, Kuo KN, et al. Medical claims-based case-control study of temporal relationship between clinical visits for hand syndromes and subsequent diabetes diagnosis: implications for identifying patients with undiagnosed type 2 diabetes mellitus. *BMJ open*. 2016; 6(10):e012071. <https://doi.org/10.1136/bmjopen-2016-012071> PMID: 27798003
44. Hou WH, Li CY, Chen LH, Wang LY, Kuo KN, Shen HN, Chang MF. Prevalence of hand syndromes among patients with diabetes mellitus in Taiwan: A population-based study. *Journal of Diabetes*. 2017; 9(6):622–7. <https://doi.org/10.1111/1753-0407.12455> PMID: 27485041
45. Karadag O, Kalyoncu U, Akdogan A, Karadag YS, Bilgen SA, Ozbakir S, et al. Sonographic assessment of carpal tunnel syndrome in rheumatoid arthritis: prevalence and correlation with disease activity. *Rheumatology international*. 2012; 32:2313–9. <https://doi.org/10.1007/s00296-011-1957-0> PMID: 21607558
46. Karpitskaya Y, Novak CB, Mackinnon SE. Prevalence of smoking, obesity, diabetes mellitus, and thyroid disease in patients with carpal tunnel syndrome. *Annals of plastic surgery*. 2002; 48(3):269–73. <https://doi.org/10.1097/0000637-200203000-00007> PMID: 11862031
47. Kidwai SS, Wahid L, Siddiqi SA, Khan RM, Ghauri I, Sheikh I. Upper limb musculoskeletal abnormalities in type 2 diabetic patients in low socioeconomic strata in Pakistan. *BMC research notes*. 2013; 6:1–6.
48. Kim YH, Yang K-S, Kim H, Seok HY, Lee JH, Son MH, Kim B-J. Does diabetes mellitus influence carpal tunnel syndrome? *Journal of Clinical Neurology (Seoul, Korea)*. 2017; 13(3):243. <https://doi.org/10.3988/jcn.2017.13.3.243> PMID: 28748675

49. Mattioli S, Baldasseroni A, Bovenzi M, Curti S, Cooke RM, Campo G, et al. Risk factors for operated carpal tunnel syndrome: a multicenter population-based case-control study. *BMC Public Health*. 2009; 9:1–15.
50. Melchior M, Roquelaure Y, Evanoff B, Chastang J-F, Ha C, Imbernon E, et al. Why are manual workers at high risk of upper limb disorders? The role of physical work factors in a random sample of workers in France (the Pays de la Loire study). *Occupational and environmental medicine*. 2006; 63(11):754–61. <https://doi.org/10.1136/oem.2005.025122> PMID: 16787978
51. Naha U, Miller A, Patetta MJ, Barragan Echenique DM, Mejia A, Amirouche F, Gonzalez MH. The interaction of diabetic peripheral neuropathy and carpal tunnel syndrome. *Hand*. 2023; 18(1\_suppl):43S–7S. <https://doi.org/10.1177/15589447211014607> PMID: 34032176
52. Oktayoglu P, Nas K, Kiling F, Tasdemir N, Bozkurt M, Yildiz I. Assessment of the presence of carpal tunnel syndrome in patients with diabetes mellitus, hypothyroidism and acromegaly. *Journal of clinical and diagnostic research: JCDDR*. 2015; 9(6):OC14. <https://doi.org/10.7860/JCDDR/2015/13149.6101> PMID: 26266148
53. Pandey A, Usman K, Reddy H, Gutch M, Jain N, Qidwai S. Prevalence of hand disorders in type 2 diabetes mellitus and its correlation with microvascular complications. *Annals of medical and health sciences research*. 2013; 3(3):349–54. <https://doi.org/10.4103/2141-9248.117942> PMID: 24116312
54. Rajendran SR, Bhansali A, Wallia R, Dutta P, Bansal V, Shanmugasundar G. Prevalence and pattern of hand soft-tissue changes in type 2 diabetes mellitus. *Diabetes & metabolism*. 2011; 37(4):312–7.
55. Rhee SY, Cho HE, Kim JH, Kim HS. Incidence and reappraisal of known risk factors associated with carpal tunnel syndrome: a nationwide, 11-year, population-based study in South Korea. *Journal of Clinical Neurology (Seoul, Korea)*. 2021; 17(4):524. <https://doi.org/10.3988/jcn.2021.17.4.524> PMID: 34595860
56. Rydberg M, Zimmerman M, Gottsäter A, Nilsson PM, Melander O, Dahlin LB. Diabetes mellitus as a risk factor for compression neuropathy: a longitudinal cohort study from southern Sweden. *BMJ Open Diabetes Research and Care*. 2020; 8(1):e001298. <https://doi.org/10.1136/bmjdr-2020-001298> PMID: 32299900
57. Shen P-C, Chang P-C, Jou I-M, Chen C-H, Lee F-H, Hsieh J-L. Hand tendinopathy risk factors in Taiwan: A population-based cohort study. *Medicine*. 2019; 98(1). <https://doi.org/10.1097/MD.00000000000013795> PMID: 30608391
58. Solomon DH, Katz JN, Bohn R, Mogun H, Avorn J. Nonoccupational risk factors for carpal tunnel syndrome. *Journal of general internal medicine*. 1999; 14:310–4. <https://doi.org/10.1046/j.1525-1497.1999.00340.x> PMID: 10337041
59. Wessel LE, Fufa DT, Boyer MI, Calfee RP. Epidemiology of carpal tunnel syndrome in patients with single versus multiple trigger digits. *The Journal of Hand Surgery*. 2013; 38(1):49–55. <https://doi.org/10.1016/j.jhsa.2012.08.040> PMID: 23200219
60. Bland JD. The relationship of obesity, age, and carpal tunnel syndrome: more complex than was thought? *Muscle & Nerve: Official Journal of the American Association of Electrodiagnostic Medicine*. 2005; 32(4):527–32. <https://doi.org/10.1002/mus.20408> PMID: 16025527
61. Cazares-Manríquez MA, Wilson CC, Vardasca R, García-Alcaraz JL, Olguín-Tiznado JE, López-Barreras JA, et al. A review of carpal tunnel syndrome and its association with age, body mass index, cardiovascular risk factors, hand dominance, and sex. *Applied Sciences*. 2020; 10(10):3488.
62. de Rijk MC, Vermeij FH, Sijtsma M, van Doorn PA. Does a carpal tunnel syndrome predict an underlying disease? *J Neurol Neurosurg Psychiatry*. 2007; 78(6):635–7. Epub 20061020. <https://doi.org/10.1136/jnnp.2006.102145> PMID: 17056628; PubMed Central PMCID: PMC2077979.
63. Perkins BA, Olaleye D, Bril V. Carpal tunnel syndrome in patients with diabetic polyneuropathy. *Diabetes Care*. 2002; 25(3):565–9. <https://doi.org/10.2337/diacare.25.3.565> PMID: 11874948
64. Dahlin LB, Sandén H, Dahlin E, Zimmerman M, Thomsen N, Björkman A. Low myelinated nerve-fibre density may lead to symptoms associated with nerve entrapment in vibration-induced neuropathy. *J Occup Med Toxicol*. 2014; 9(1):7. Epub 20140308. <https://doi.org/10.1186/1745-6673-9-7> PMID: 24606755; PubMed Central PMCID: PMC3974023.
65. Goldin A, Beckman JA, Schmidt AM, Creager MA. Advanced glycation end products: sparking the development of diabetic vascular injury. *Circulation*. 2006; 114(6):597–605. <https://doi.org/10.1161/CIRCULATIONAHA.106.621854> PMID: 16894049.
66. Mojaddidi MA, Ahmed MS, Ali R, Jeziorska M, Al-Sunni A, Thomsen NO, et al. Molecular and pathological studies in the posterior interosseous nerve of diabetic and non-diabetic patients with carpal tunnel syndrome. *Diabetologia*. 2014; 57(8):1711–9. Epub 20140528. <https://doi.org/10.1007/s00125-014-3271-3> PMID: 24865616.
67. Szklo M, Nieto FJ. *Epidemiology: beyond the basics*: Jones & Bartlett Publishers; 2014.
